## Forecasting the Wuhan coronavirus (2019-nCoV) epidemics using a simple (simplistic) model

**Slav W. Hermanowicz, Ph.D.**

*Tsinghua-Berkeley Shenzhen Institute  
Department of Civil and Environmental Engineering  
University of California, Berkeley, CA 94720, USA  
e-mail: [hermanowicz@ce.berkeley.edu](mailto:hermanowicz@ce.berkeley.edu)*

**Version 1: February 3, 2020 14:21 GMT+8**

**Version 2: February 4, 2020 07:24 GMT+8**

### **Abstract and Findings**

Confirmed infection cases in mainland China were analyzed using the data up to January 28, 2020 (first **13 days** of reliable confirmed cases). In addition, all available data up to February 3 were processed the same way. For the first period the cumulative number of cases followed an exponential function. However, from January 28, we discerned a downward deviation from the exponential growth. This slower-than-exponential growth was also confirmed by a steady decline of the effective reproduction number. A backtrend analysis suggested the original basic reproduction number  $R_0$  to be about 2.4 – 2.5. We used a simple logistic growth model that fitted very well with **all data** reported until the time of writing. Using this model and the first set of data, we estimate that **the maximum cases** will be about 21,000 reaching this level in mid-February. Using all available data the maximum number of cases is somewhat higher at 29,000 but its dynamics does not change. These predictions do not account for any possible other secondary sources of infection.

### **Introduction**

Recent outbreak of a novel coronavirus (designated 2019-nCoV) originated in Wuhan, China raised serious public health concerns and many human tragedies. To manage the epidemics resulting from virus spreading across China and other countries forecasting the occurrence of future cases is extremely important. Such forecasting is very complicated and uncertain since many factors are poorly understood or estimated with a large possible error. Two major factors include spatial movement of virus carriers (i.e., infected individuals) and the basic reproduction number  $R_0$  (average number of new infections originated from an infected individual).

As a result of great public attention to the virus spreading several approaches were recently reported attempting to model the epidemics and infection dynamics (Chen et al., 2020; Hui et al., 2020; Imai, Cori, et al., 2020; Imai, Dorigatti, Cori, Donnelly, et al., 2020; Li et al., 2020; Linton et al., 2020; Liu et al., 2020; Shen, Peng, Xiao, & Zhang, 2020; Wu, Leung, & Leung, 2020; Zhang & Wang, 2020b; Zhao et al., 2020a). These models are certainly useful to understand the implications of various quarantine procedures, public health actions, and possible virus

modifications. However, the reported models are, by its nature, very complicated with numerous assumptions and requiring many parameters values of which are not known with good accuracy. As a result, some predictions (Nishiura et al., 2020) were more educated guesses although eventually they were confirmed qualitatively.

In this work, we present the results of fitting a very simple (perhaps even simplistic) model to the available data and a forecast of new infections.

## Logistic Model and its Application

The logistic model has been used in population dynamics and specifically in epidemics for a long time (Bailey, 1950; Bangert, Molyneux, Lindsay, Fitzpatrick, & Engels, 2017; Cockburn, 1960; Jowett, Browning, & Haning, 1974; Koopman, 2004; Mansfield & Hensley, 1960; Waggoner & Aylor, 2000). Mathematically, the model describes dynamic evolution of a population  $P$  (in our case the number of infected individuals) being controlled by the growth rate  $r$  and population capacity  $K$  due to limiting resources. In continuous time  $t$  the change of  $P$  is

$$dP/dt = r P \left(1 - \frac{P}{K}\right) \quad (1)$$

Initially, the growth of  $P$  is close to exponential since the term  $(1 - P/K)$  is almost one. When  $P$  becomes larger (commensurate with  $K$ ) the growth rate slows down with

$$r_e = r \left(1 - \frac{P}{K}\right) \quad (2)$$

becoming an effective instantaneous growth rate.

In discrete time, more appropriate to daily reported infection cases, the logistic model becomes

$$P(t + 1) = R_0^* P(t) \left[1 - \frac{P(t)}{K}\right] \quad (3)$$

where  $P(t)$  and  $P(t+1)$  are populations on consecutive days,  $R_0^*$  is the growth rate (basic reproduction number in epidemiology) at the beginning of the logistic growth, and  $K$  is the limiting population. When plotted as a function of time  $t$ , both Eqs. (1) and (3) result in a classic sigmoidal curve with

$$R_e = R_0^* \left[1 - \frac{P(t)}{K}\right] \quad (4)$$

being the effective reproduction rate at time  $t$ .

The logistic model may be adequate for the analysis of mainland China since the country can be treated as a unit where a vast majority of cases occurred without any **significant** “import” or “export” of cases.

## Data Analysis

We analyzed infection cases in mainland China as reported by the National Health Commission of the People's Republic of China ([www.nhc.gov.cn/xcs/xxgzbd/gzbd\\_index.shtml](http://www.nhc.gov.cn/xcs/xxgzbd/gzbd_index.shtml)). As of the time of writing (February 3, 2020 14:21 GMT+8) the number of cases are shown in Table 1. The data are also plotted in Figure 1. The first column in Table 1 represents days from the beginning of the outbreak. There is a considerable controversy as to the exact date of the outbreak with most reports pointing to mid-December (Li et al., 2020; Wang, Horby, Hayden, & Gao, 2020) while one analysis suggest multiple sources of original infection (Nishiura et al., 2020). Initially, the outbreak was recognized and number of *confirmed* cases is not fully known (P. Wu et al., 2020).

For the purpose of our analysis, we assumed the outbreak date of December 17, 2019 as a best estimate following the work of Zhang and co-workers (Zhang & Wang, 2020a, 2020b). We tested our analysis for a small range of different initial dates without significant changes in the results.

**Table 1** Reported cases in mainland China

| Day       | Date                    | Cases        | $R_e$ |
|-----------|-------------------------|--------------|-------|
| <b>30</b> | <b>January 16, 2020</b> | <b>45</b>    |       |
| <b>31</b> | <b>January 17, 2020</b> | <b>62</b>    | 1.38  |
| <b>32</b> | <b>January 18, 2020</b> | <b>121</b>   | 1.95  |
| <b>33</b> | <b>January 19, 2020</b> | <b>198</b>   | 1.64  |
| <b>34</b> | <b>January 20, 2020</b> | <b>291</b>   | 1.47  |
| <b>35</b> | <b>January 21, 2020</b> | <b>440</b>   | 1.51  |
| <b>36</b> | <b>January 22, 2020</b> | <b>571</b>   | 1.30  |
| <b>37</b> | <b>January 23, 2020</b> | <b>830</b>   | 1.45  |
| <b>38</b> | <b>January 24, 2020</b> | <b>1,287</b> | 1.55  |
| <b>39</b> | <b>January 25, 2020</b> | <b>1,975</b> | 1.53  |
| <b>40</b> | <b>January 26, 2020</b> | <b>2,744</b> | 1.39  |
| <b>41</b> | <b>January 27, 2020</b> | <b>4,515</b> | 1.65  |
| <b>42</b> | <b>January 28, 2020</b> | <b>5,974</b> | 1.32  |
| 43        | January 29, 2020        | 7,711        | 1.29  |
| 44        | January 30, 2020        | 9,692        | 1.26  |
| 45        | January 31, 2020        | 11,860       | 1.22  |
| 46        | February 1, 2020        | 14,380       | 1.21  |
| 47        | February 2, 2020        | 17,307       | 1.20  |
| 48        | February 3, 2020        | 20,467       | 1.18  |

**Bold entries** represent data used for model fitting from the initial phase, all data were used for second fitting.

Initially, as shown in Figure 1, the number of cases increased exponentially. This feature was also clearly recognized in a previous report (Zhao et al., 2020b). However, starting from January

28 (day 42) there was a marked deviation from the exponential curve, in line with logistic growth. This decline of the **growth rate** is clearly demonstrated by a steady decline of the effective reproduction number  $R_e$  (fourth column in Table 2) calculated simply as a ratio of cases on consecutive days

$$R_e(t) = \left[ \frac{P(t+1)}{P(t)} \right] = R_0^* \left( 1 - \frac{P(t)}{K} \right) = R_0^* - \left[ \frac{R_0^*}{K} \right] P(t) \quad (5)$$

Eq. (5) also shows a linearization of the discrete logistic model (Eq. (3)) that was used to estimate the  $R_e(t=30) = R_0^*$  at 1.53 using initial 13 points (blue points and line in Figure 2). The same figure also shows linearization using **all** data from day 34 up to currently available (orange points and line in Figure 2). The resulting estimate of  $R_0^*$  is 1.48. For both linearizations, the effective reproduction numbers decrease in time.

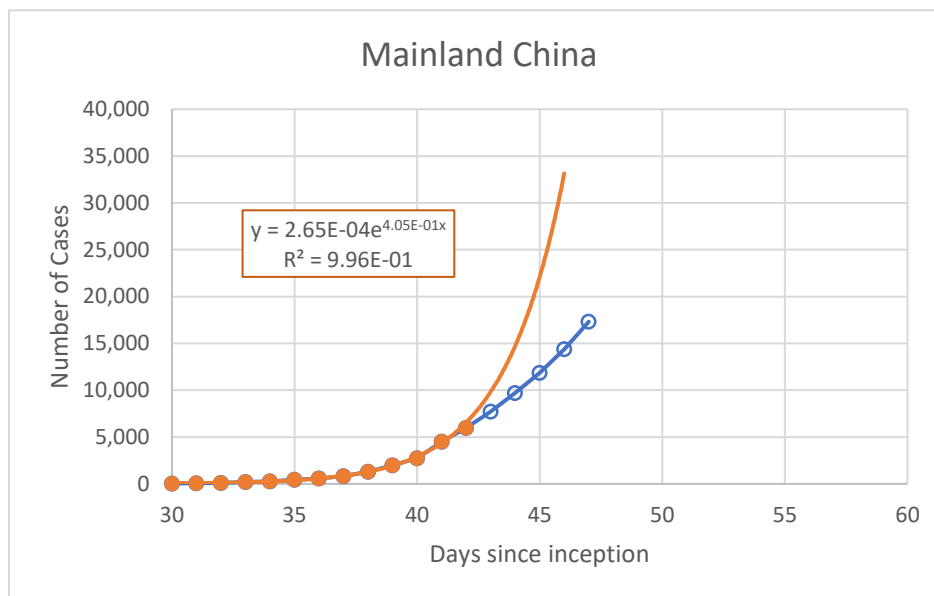

Figure 1 Evolution of recorded infection cases. Orange points (days 30 – 42) used to predict exponential growth. From day 42 there is a significant slowing of the infections.

In contrast, a simple linearization of  $R_e$  in time (Figure 3) back-estimated the original basic reproduction number  $R_0$  at about 2.4 to 2.5, agreeing well with other values recently reported (Imai, Dorigatti, Cori, Riley, & Ferguson, 2020; Liu et al., 2020; Majumder & Mandl, 2020; Zhang & Wang, 2020a, 2020b; Zhao et al., 2020a). The discrepancy between these two estimates can be attributed a potential loss of virulence of the virus but most likely due to extreme measures to contain virus spread in China.

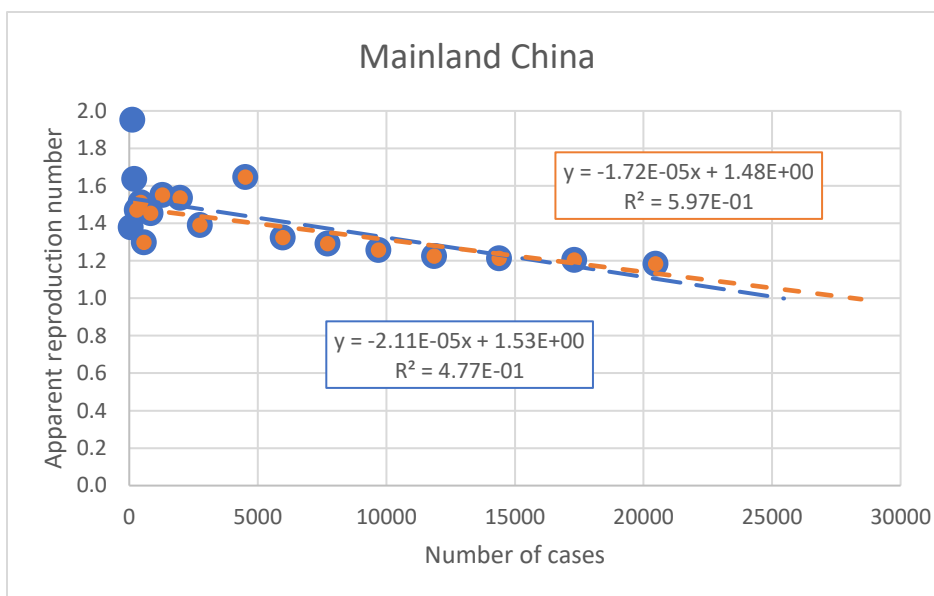

Figure 2 Linearization of the effective reproduction number with number of cases

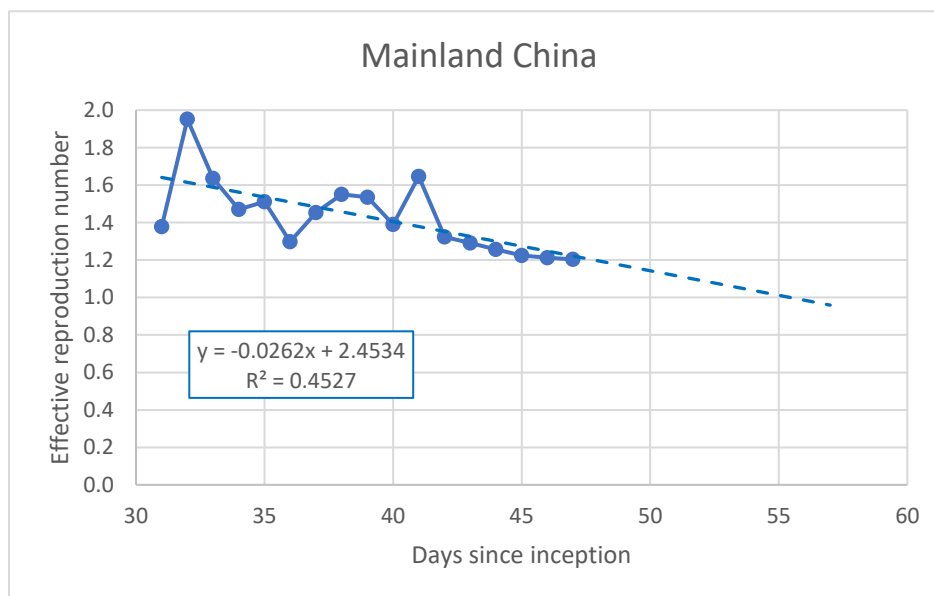

Figure 3 Linearization of the effective reproduction number with time

### Forecast and Discussion

Based on the linearization of Eq. (5), we obtained the parameters of the logistic model with  $R_0^* = 1.53$  and  $K = 6.2 \cdot 10^4$  for the initial calibration dataset. For all data calibration,  $R_0^* = 1.48$  and  $K = 8.6 \cdot 10^4$ . The resulting prediction of future infection cases are shown in Figure 4

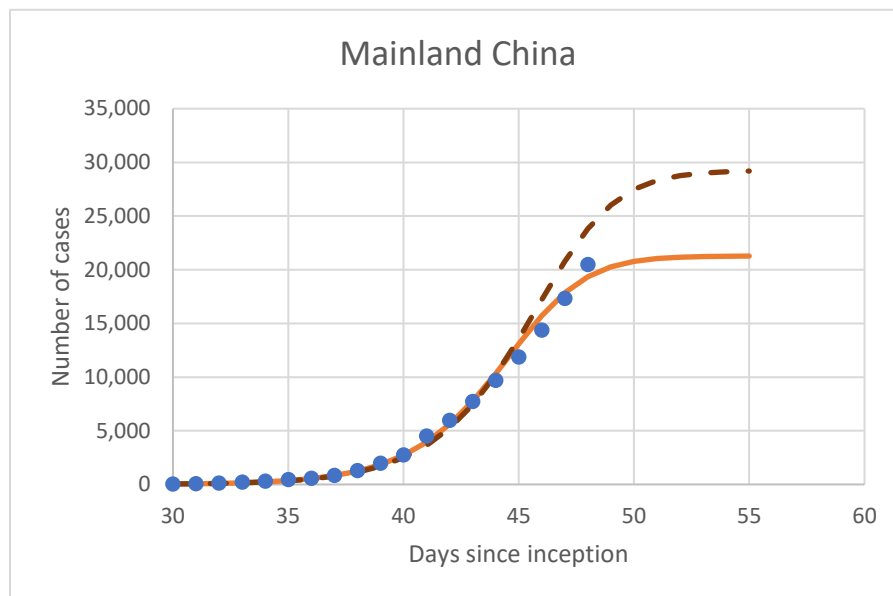

Figure 4 Recorded infection cases (up to day 48 = February 3). Orange line denote predictions from the initial 13-day dataset used for model calibration. Broken brown line shows model predictions using all data. Blue points fit model predictions.

The model predicted further increases of the infected cases but slower than the initial exponential growth. So far, the predictions fitted to the daily reports very well. The **critical feature** of the model is the **stabilization** of the total number of cases in the next several days at slightly above 20,000 using the initial 13 days for model calibration and about 29,000 using all data for model calibration. This prediction is made purely based on the described analysis and may or may not happen in the future. One significant factor that could invalidate the predictions is a possibility of secondary or parallel outbreaks perhaps with different etiology as previously suggested for the original Wuhan outbreak (P. Wu et al., 2020)

## Declarations

### ***Ethics approval and consent to participate***

The ethical approval or individual consent was not applicable.

### ***Availability of data and materials***

All data and materials used in this work were publicly available.

### ***Consent for publication***

Not applicable.

### ***Funding***

This work was not funded.

### ***Disclaimer***

The funding agencies had no role in the design and conduct of the study; collection, management, analysis, and interpretation of the data; preparation, review, or approval of the manuscript; or decision to submit the manuscript for publication.

### ***Conflict of Interests***

The author declared no competing interests.

## References

- Bailey, N. T. J. (1950). A SIMPLE STOCHASTIC EPIDEMIC. *Biometrika*, 37(3-4), 193-202. doi:10.1093/biomet/37.3-4.193
- Bangert, M., Molyneux, D. H., Lindsay, S. W., Fitzpatrick, C., & Engels, D. (2017). The cross-cutting contribution of the end of neglected tropical diseases to the sustainable development goals. *Infectious Diseases of Poverty*, 6. doi:10.1186/s40249-017-0288-0
- Chen, T., Rui, J., Wang, Q., Zhao, Z., Cui, J.-A., & Yin, L. (2020). A mathematical model for simulating the transmission of Wuhan novel Coronavirus. *bioRxiv*, 2020.2001.2019.911669. doi:10.1101/2020.01.19.911669
- Cockburn, T. A. (1960). EPIDEMIC CRISIS IN EAST PAKISTAN - APRIL-JULY, 1958. *Public Health Reports*, 75(1), 26-36. doi:10.2307/4590706
- Hui, D. S., I Azhar, E., Madani, T. A., Ntoumi, F., Kock, R., Dar, O., . . . Petersen, E. (2020). The continuing 2019-nCoV epidemic threat of novel coronaviruses to global health &#x2014; The latest 2019 novel coronavirus outbreak in Wuhan, China. *International Journal of Infectious Diseases*, 91, 264-266. doi:10.1016/j.ijid.2020.01.009
- Imai, N., Cori, A., Dorigatti, I., Baguelin, M., Donnelly, C., Riley, S., & Ferguson, N. M. (2020). *Report 3: Transmissibility of 2019-nCoV* Retrieved from London, UK: <https://www.imperial.ac.uk/media/imperial-college/medicine/sph/ide/gida-fellowships/Imperial-2019-nCoV-transmissibility.pdf>
- Imai, N., Dorigatti, I., Cori, A., Donnelly, C., Riley, S., & Ferguson, N. M. (2020). *Report 2: Estimating the potential total number of novel Coronavirus cases in Wuhan City, China* Retrieved from London, UK: <https://www.imperial.ac.uk/media/imperial-college/medicine/sph/ide/gida-fellowships/2019-nCoV-outbreak-report-22-01-2020.pdf>
- Imai, N., Dorigatti, I., Cori, A., Riley, S., & Ferguson, N. M. (2020). *Report 1: Estimating the potential total number of novel Coronavirus (2019-nCoV) cases in Wuhan City, China* Retrieved from London, UK: <https://www.imperial.ac.uk/media/imperial-college/medicine/sph/ide/gida-fellowships/2019-nCoV-outbreak-report-17-01-2020.pdf>

- Jowett, D., Browning, J. A., & Haning, B. C. (1974). *NONLINEAR DISEASE PROGRESS CURVES*.
- Koopman, J. (2004). Modeling infection transmission. *Annual Review of Public Health*, 25, 303-326. doi:10.1146/annurev.publhealth.25.102802.124353
- Li, Q., Guan, X., Wu, P., Wang, X., Zhou, L., Tong, Y., . . . Feng, Z. (2020). Early Transmission Dynamics in Wuhan, China, of Novel Coronavirus–Infected Pneumonia. *New England Journal of Medicine*. doi:10.1056/NEJMoa2001316
- Linton, N. M., Kobayashi, T., Yang, Y., Hayashi, K., Akhmetzhanov, A. R., Jung, S.-m., . . . Nishiura, H. (2020). Epidemiological characteristics of novel coronavirus infection: A statistical analysis of publicly available case data. *medRxiv*, 2020.2001.2026.20018754. doi:10.1101/2020.01.26.20018754
- Liu, T., Hu, J., Kang, M., Lin, L., Zhong, H., Xiao, J., . . . Ma, W. (2020). Transmission dynamics of 2019 novel coronavirus (2019-nCoV). *bioRxiv*, 2020.2001.2025.919787. doi:10.1101/2020.01.25.919787
- Majumder, M., & Mandl, K. D. (2020). Early Transmissibility Assessment of a Novel Coronavirus in Wuhan, China (January 26, 2020). *SSRN*. doi:<http://dx.doi.org/10.2139/ssrn.3524675>
- Mansfield, E., & Hensley, C. (1960). THE LOGISTIC PROCESS - TABLES OF THE STOCHASTIC EPIDEMIC CURVE AND APPLICATIONS. *Journal of the Royal Statistical Society Series B-Statistical Methodology*, 22(2), 332-337. Retrieved from <Go to ISI>://WOS:A1960XF55400012
- Nishiura, H., Jung, S.-m., Linton, N. M., Kinoshita, R., Yang, Y., Hayashi, K., . . . Akhmetzhanov, A. R. (2020). The Extent of Transmission of Novel Coronavirus in Wuhan, China, 2020. *Journal of Clinical Medicine*, 9(2), 330. Retrieved from <https://www.mdpi.com/2077-0383/9/2/330>
- Shen, M., Peng, Z., Xiao, Y., & Zhang, L. (2020). Modelling the epidemic trend of the 2019 novel coronavirus outbreak in China. *bioRxiv*, 2020.2001.2023.916726. doi:10.1101/2020.01.23.916726
- Waggoner, P. E., & Aylor, D. E. (2000). Epidemiology: A science of patterns. *Annual Review of Phytopathology*, 38, 71-+. doi:10.1146/annurev.phyto.38.1.71
- Wang, C., Horby, P. W., Hayden, F. G., & Gao, G. F. (2020). A novel coronavirus outbreak of global health concern. *The Lancet*. doi:10.1016/S0140-6736(20)30185-9
- Wu, J. T., Leung, K., & Leung, G. M. (2020). Nowcasting and forecasting the potential domestic and international spread of the 2019-nCoV outbreak originating in Wuhan, China: a modelling study. *The Lancet*. doi:10.1016/S0140-6736(20)30260-9
- Wu, P., Hao, X., Lau, E. H. Y., Wong, J. Y., Leung, K. S. M., Wu, J. T., . . . Leung, G. M. (2020). Real-time tentative assessment of the epidemiological characteristics of novel coronavirus infections in Wuhan, China, as at 22 January 2020. *Eurosurveillance*, 25(3), 2000044. doi:doi:<https://doi.org/10.2807/1560-7917.ES.2020.25.3.2000044>
- Zhang, C., & Wang, M. (2020a). MRCA time and epidemic dynamics of the 2019 novel coronavirus. *bioRxiv*, 2020.2001.2025.919688. doi:10.1101/2020.01.25.919688
- Zhang, C., & Wang, M. (2020b). Origin time and epidemic dynamics of the 2019 novel coronavirus. *bioRxiv*, 2020.2001.2025.919688. doi:10.1101/2020.01.25.919688
- Zhao, S., Lin, Q., Ran, J., Musa, S. S., Yang, G., Wang, W., . . . Wang, M. H. (2020a). Preliminary estimation of the basic reproduction number of novel coronavirus (2019-



nCoV) in China, from 2019 to 2020: A data-driven analysis in the early phase of the outbreak. *bioRxiv*, 2020.2001.2023.916395. doi:10.1101/2020.01.23.916395

Zhao, S., Lin, Q., Ran, J., Musa, S. S., Yang, G., Wang, W., . . . Wang, M. H. (2020b). Preliminary estimation of the basic reproduction number of novel coronavirus (2019-nCoV) in China, from 2019 to 2020: A data-driven analysis in the early phase of the outbreak. *International Journal of Infectious Diseases*. doi:10.1016/j.ijid.2020.01.050
